# Supplementary material for: Isoalantolactone inhibits pancreatic cancer proliferation by regulation of PI3K and Wnt signal pathway
Source: PubMed Central journal article supplement (PMC7932101; doi:10.1371/journal.pone.0247752), 2021-03-04

11/9/17

Figure 4B

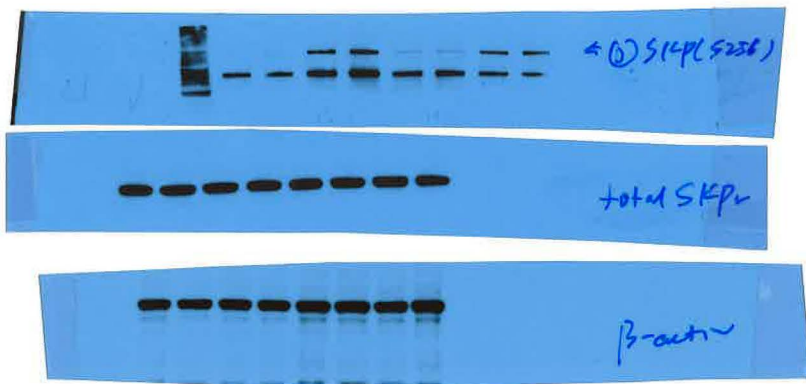

11/20/17

Figure 4c

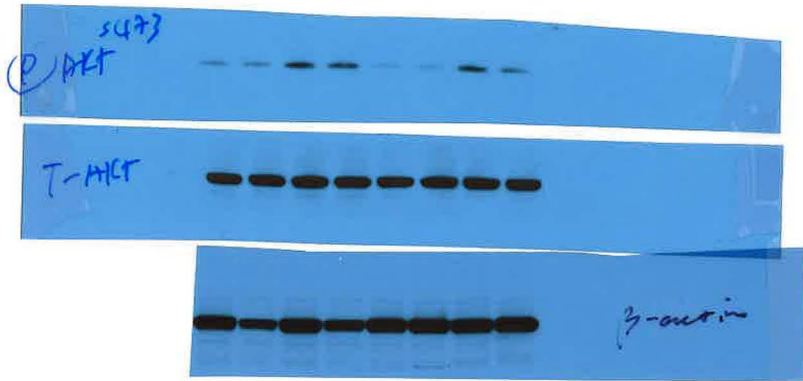

03/31/2015

Figure 5A

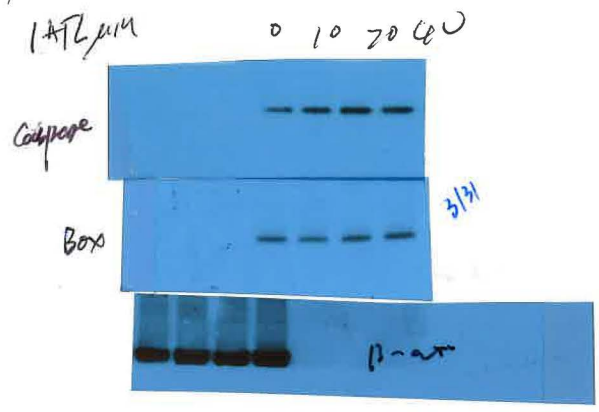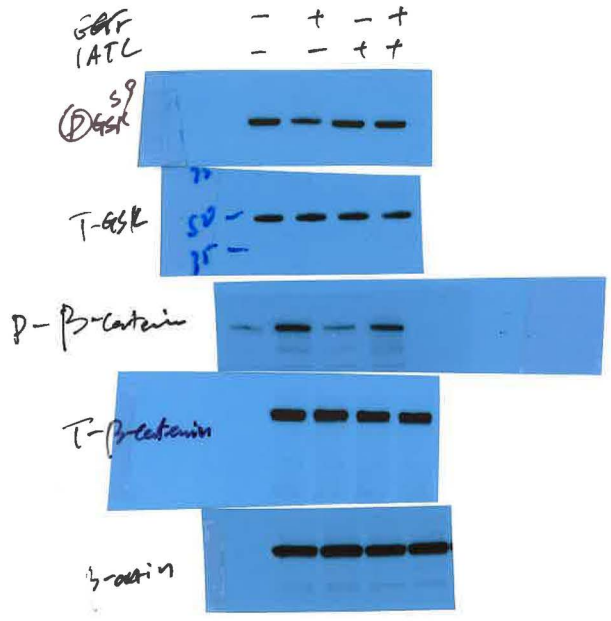

Figure 5B

07/13/15

Figure 5 c

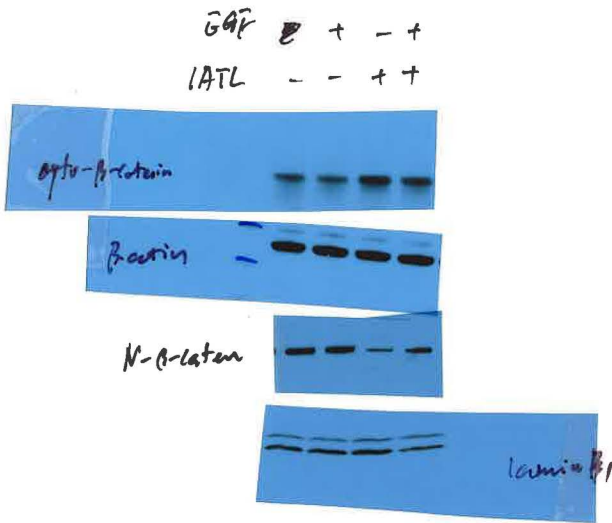

11/09/17

Figure 4 A

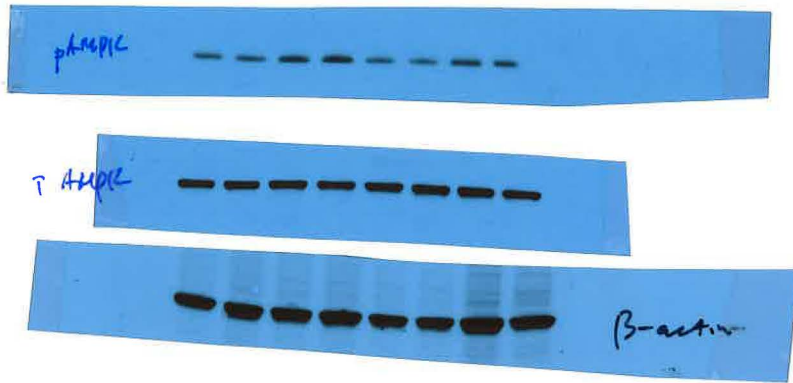

Supplement: pone.0247752.s001.pdf [file pone.0247752.s001.pdf]
